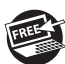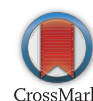

## Issues and Events

### PROFESSIONAL EDUCATION

The American Diabetes Association offers a variety of continuing education opportunities and materials for health care professionals. Educational offerings include live and free online programs. For more information, including a complete list of American Diabetes Association programs, please visit [professional.diabetes.org/ce](http://professional.diabetes.org/ce).

### SCIENTIFIC SESSIONS

The 77th annual American Diabetes Association Scientific Sessions will be held in San Diego, California, on 9–13 June 2017, at the San Diego Convention Center. The largest of its kind, this meeting brings together scientists and health care professionals from around the world who are involved in diabetes research and care. Attendees choose from over 3,000 original presentations given by leading experts in the field. For more information, please visit [scientificsessions.diabetes.org](http://scientificsessions.diabetes.org).

### ADVANCED POSTGRADUATE COURSE

The 64th annual American Diabetes Association Advanced Postgraduate Course will be held in Washington, DC, on 17–19 February 2017. Join your colleagues and diabetes experts for presentations and discussions on cutting-edge clinical research in diabetes. The course will cover the latest clinical research translated into evidence-based treatment strategies to improve outcomes in your patients with diabetes. Discuss clinical cases with world-renown faculty, and take home practical patient management tools that you can use immediately in your practice. For more information, please visit <http://professional.diabetes.org/ce>.

### CLINICAL CONFERENCE ON DIABETES

Webcasts from the 31st annual American Diabetes Association Clinical Conference on Diabetes are available. The conference sessions included 1) comprehensive information about exercise, nutrition, and diabetes; 2) the latest information on the medical and behavioral management of diabetes and its complications; 3) practical tips and proven strategies for improving patient care, including motivational interviewing and data-driven decisions; and 4) translation of the latest diabetes research into clinical practice. To access the webcasts, please visit <http://professional.diabetes.org/ce>.

### DIABETES IS PRIMARY

Webcasts from the latest Diabetes is Primary event are available. Held in conjunction with the 76th annual Scientific Sessions, the American Diabetes Association brought together health care professionals interested in the clinical management of diabetes and its complications for an innovative educational initiative developed specifically for the primary care community. The presentations offer information and tools needed to improve patient outcomes through patient engagement. To access the webcasts, please visit <http://professional.diabetes.org/ce>.

### DIABETES CORE UPDATE PODCASTS

*Diabetes Core Update* is a monthly audio podcast devoted to presenting and discussing the latest clinically relevant articles from the American Diabetes Association's scholarly journals. *Diabetes Core Update* audio podcasts are free and can be accessed through iTunes or RSS feed. For more information, please visit <http://www.diabetesjournals.org/content/diabetes-core-update-podcasts>.
